# Supplementary material for: Dinuclear Zn2+complexes in the hydrolysis of the phosphodiester linkage in a diribonucleoside monophosphate diester
Source: Royal Society of Chemistry journal article supplement (doi:10.1039/b312301d), 2004-01-01
Supplement: b312301d.pdf [file b312301d.pdf]

## Electronic Supplementary Information

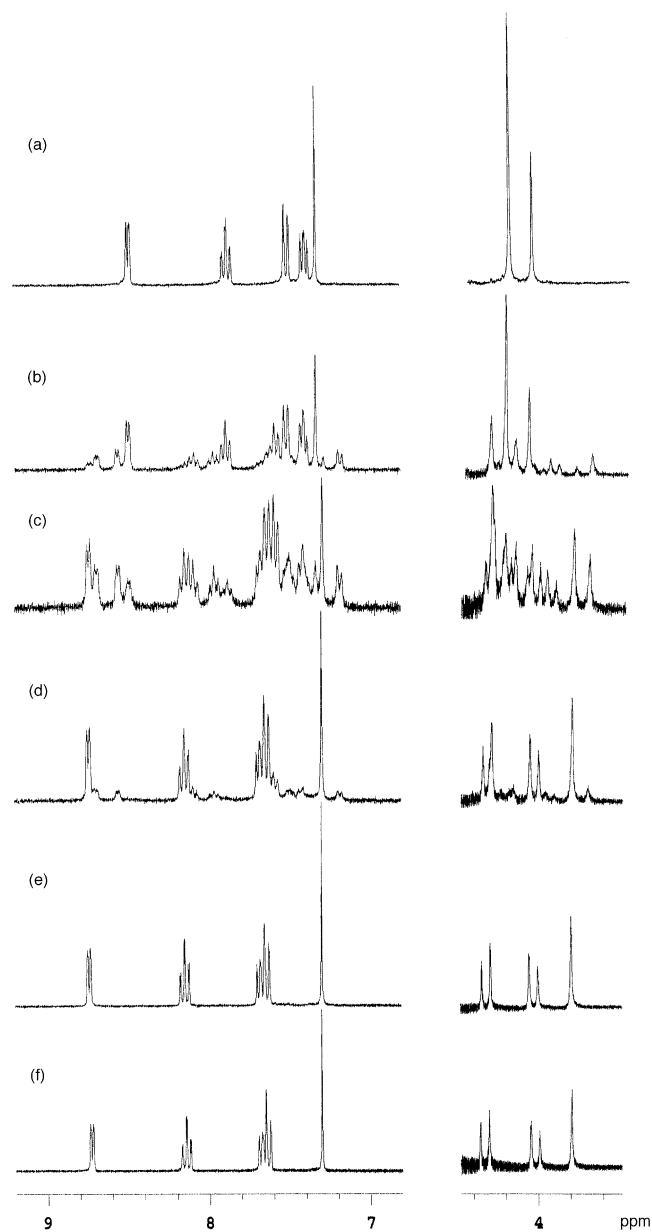

**Fig. S1**  $^1\text{H}$  NMR spectra of the  $\text{Zn}(\text{NO}_3)_2 + \mathbf{3}$  system at rt (pD 7). The concentration of  $\mathbf{3}$  was fixed at 5 mM, and that of  $\text{Zn}(\text{NO}_3)_2$  was varied. (a)  $[\text{Zn}(\text{NO}_3)_2] = 0$  mM, (b)  $[\text{Zn}(\text{NO}_3)_2] = 2.5$  mM, (c)  $[\text{Zn}(\text{NO}_3)_2] = 5$  mM, (d)  $[\text{Zn}(\text{NO}_3)_2] = 7.5$  mM, (e)  $[\text{Zn}(\text{NO}_3)_2] = 10$  mM, (f)  $[\text{Zn}(\text{NO}_3)_2] = 50$  mM. The region of pyridyl and phenyl proton signals (left) and that of other proton signals (right) are shown separately.

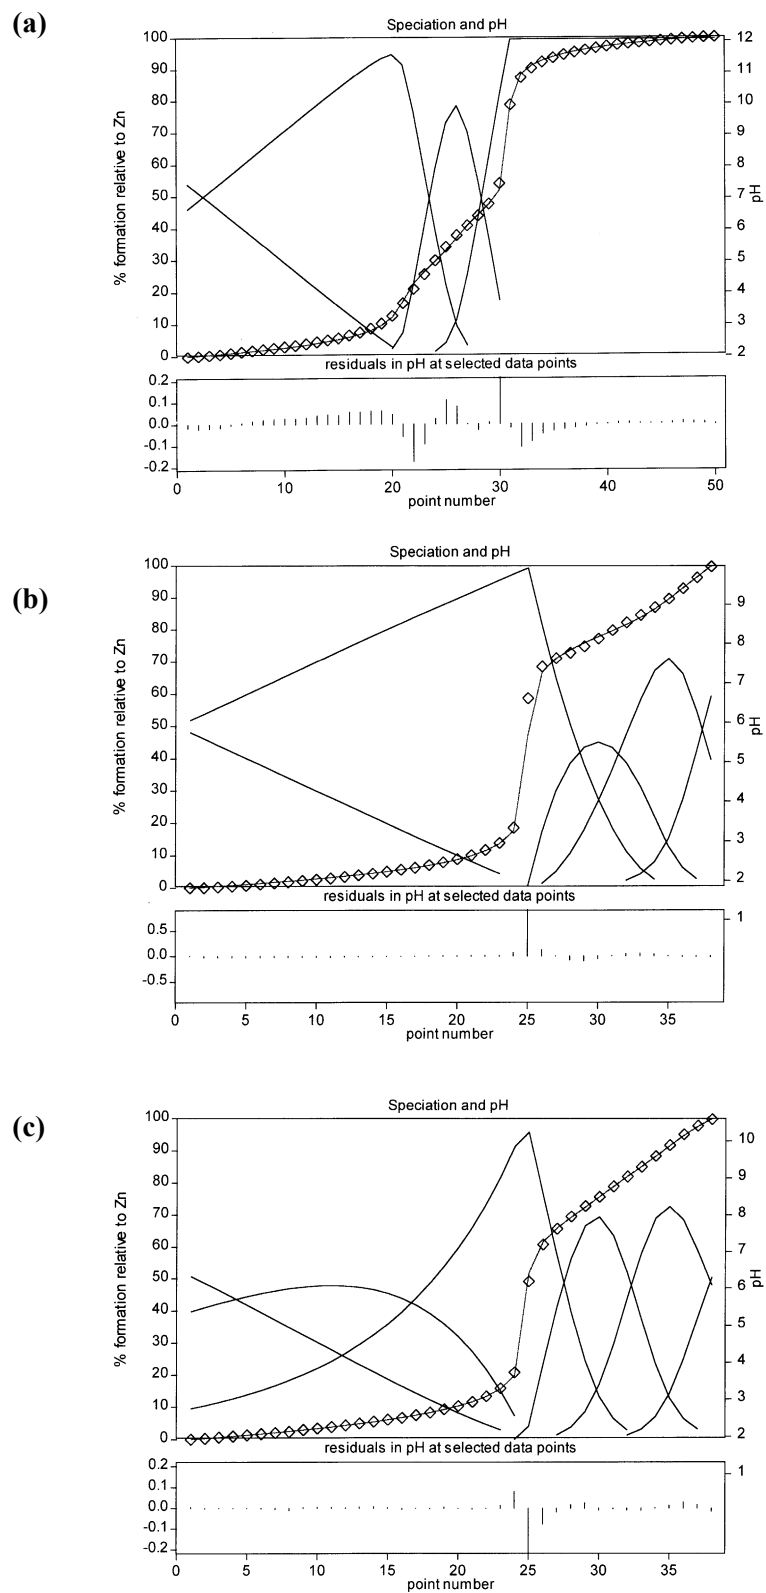

**Fig. S2** Titration data and theoretical curves. (a) The 2:1 mixture of  $\text{Zn}(\text{NO}_3)_2$  and **1**, (b) the 2:1 mixture of  $\text{Zn}(\text{NO}_3)_2$  and **2** and (c) the 2:1 mixture of  $\text{Zn}(\text{NO}_3)_2$  and **3**.

(a)

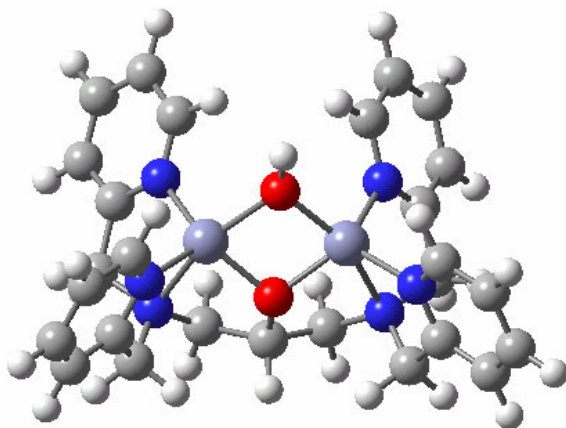

(b)

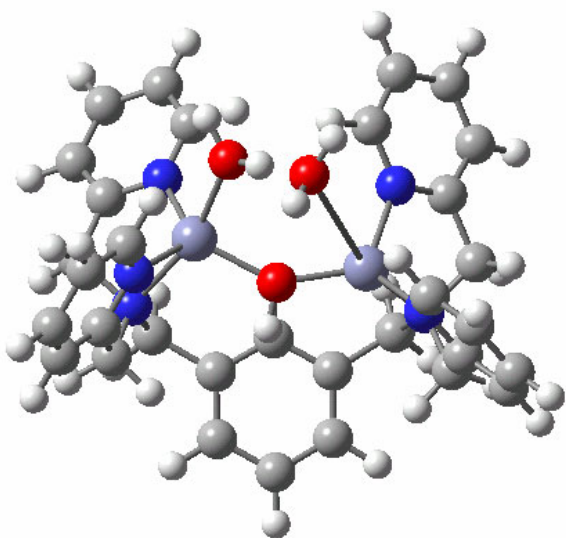

**Fig. S3** Optimized structures of (a) Zn<sub>2</sub>1H<sub>2</sub> and (b) Zn<sub>2</sub>2H<sub>11</sub>, obtained by *ab initio* molecular orbital calculations using the Hartree-Fock method with the 3-21G basis set. Program used was Gaussian 03W, and these figures were drawn using GaussView 3.0.
